# Supplementary material for: Prenatal Phthalate Exposures and Neurobehavioral Development Scores in Boys and Girls at 6–10 Years of Age
Source: PubMed Central journal article supplement (PMC4014764; doi:10.1289/ehp.1307063), 2014-02-21
Supplement: ehp.1307063.s001.pdf [file ehp.1307063.s001.pdf]

## **Supplemental Material**

### **Prenatal Phthalate Exposures and Neurobehavioral Development Scores in Boys and Girls at 6-10 Years of Age**

Roni W. Kobrosly, Sarah Evans, Amir Miodovnik, Emily S. Barrett, Sally W. Thurston,  
Antonia M. Calafat, and Shanna H. Swan

| <b>Table of Contents</b>                                                                                                      | <b>Page</b> |
|-------------------------------------------------------------------------------------------------------------------------------|-------------|
| <b>Table S1.</b> Partial Pearson correlation matrix of phthalate metabolites in final sample                                  | 2           |
| <b>Table S2.</b> Comparison of demographic and phthalate distributions in initial sample of eligible mothers and final sample | 3           |

**Table S1.** Partial Pearson correlation matrix of phthalate metabolites in final sample [correlation (p-value)].<sup>a</sup>

| <b>Metabolite</b> | <b>ln(MEHP)</b> | <b>ln(MEHHP)</b> | <b>ln(MEOHP)</b> | <b>ln(MiBP)</b> | <b>ln(MBP)</b> | <b>ln(MBzP)</b> | <b>ln(MEP)</b> |
|-------------------|-----------------|------------------|------------------|-----------------|----------------|-----------------|----------------|
| ln(MEHP)          |                 |                  |                  |                 |                |                 |                |
| ln(MEHHP)         | 0.72 (< 0.001)  |                  |                  |                 |                |                 |                |
| ln(MEOHP)         | 0.76 (< 0.001)  | 0.98 (< 0.001)   |                  |                 |                |                 |                |
| ln(MiBP)          | 0.26 (0.001)    | 0.29 (< 0.001)   | 0.30 (< 0.001)   |                 |                |                 |                |
| ln(MBP)           | 0.22 (0.007)    | 0.41 (< 0.001)   | 0.39 (< 0.001)   | 0.51 (< 0.001)  |                |                 |                |
| ln(MBzP)          | 0.20 (0.01)     | 0.32 (< 0.001)   | 0.31 (< 0.001)   | 0.46 (< 0.001)  | 0.55 (< 0.001) |                 |                |
| ln(MEP)           | 0.071 (0.39)    | 0.22 (0.005)     | 0.23 (0.004)     | 0.17 (0.034)    | 0.38 (< 0.001) | 0.31 (< 0.001)  |                |

<sup>a</sup>Correlations adjusting for creatinine.

**Table S2.** Comparison of demographic and phthalate distributions [mean  $\pm$  SD or n (%)] in initial sample of eligible mothers and final sample.<sup>a</sup>

| <b>Demographics</b>                | <b>Mothers eligible for follow-up (n = 359)</b> | <b>Mothers in final sample (n = 153)</b> | <b>p-value for test of difference</b> |
|------------------------------------|-------------------------------------------------|------------------------------------------|---------------------------------------|
| Mother's race/ethnicity            |                                                 |                                          |                                       |
| Hispanic/Latina                    | 31 (8.6)                                        | 4 (2.6)                                  |                                       |
| White, non-Hispanic                | 301 (83.8)                                      | 141 (92.2)                               |                                       |
| Black                              | 7 (1.9)                                         | 5 (3.3)                                  |                                       |
| Asian                              | 17 (4.7)                                        | 3 (2.0)                                  |                                       |
| Other                              | 3 (0.8)                                         | 0 (0)                                    | 0.03                                  |
| Mother's education                 |                                                 |                                          |                                       |
| < College                          | 97 (27.0)                                       | 23 (15.0)                                |                                       |
| $\geq$ College                     | 262 (73.0)                                      | 130 (85.0)                               | 0.005                                 |
| Mother's age at enrollment (years) | 30.1 $\pm$ 5.1                                  | 31.1 $\pm$ 4.9                           | 0.04                                  |
| Family stress during pregnancy     | 1.7 $\pm$ 1.9                                   | 1.4 $\pm$ 1.7                            | 0.15                                  |
| <b>Phthalate levels</b>            |                                                 |                                          |                                       |
| ln(MEHP)                           | 1.2 $\pm$ 1.4                                   | 1.3 $\pm$ 1.5                            | 0.50                                  |
| ln(MEHHP)                          | 2.5 $\pm$ 1.3                                   | 2.6 $\pm$ 1.5                            | 0.48                                  |
| ln(MEOHP)                          | 2.4 $\pm$ 1.3                                   | 2.4 $\pm$ 1.4                            | 0.59                                  |
| ln(MiBP)                           | 0.9 $\pm$ 1.1                                   | 0.9 $\pm$ 1.1                            | 0.40                                  |
| ln(MBP)                            | 2.7 $\pm$ 1.1                                   | 2.6 $\pm$ 1.0                            | 0.29                                  |
| ln(MBzP)                           | 2.0 $\pm$ 1.3                                   | 1.9 $\pm$ 1.3                            | 0.39                                  |
| ln(MEP)                            | 4.6 $\pm$ 1.7                                   | 4.3 $\pm$ 1.7                            | 0.23                                  |

<sup>a</sup>Complete data was not available for the entire sample of eligible mothers (n = 441) so the 359 mothers with complete data are tabled.
